# Supplementary material for: Checkpoint blockade immunotherapy reshapes the high-dimensional phenotypic heterogeneity of murine intratumoural neoantigen-specific CD8+ T cells
Source: PubMed Central journal article supplement (PMC5601925; doi:10.1038/s41467-017-00627-z), 2017-09-15
Supplement: 41467_2017_627_MOESM1_ESM.pdf [file 41467_2017_627_MOESM1_ESM.pdf]

### **Description of Supplementary Files**

File name: Supplementary Information

Description: Supplementary figures and supplementary tables

File name: Peer Review File

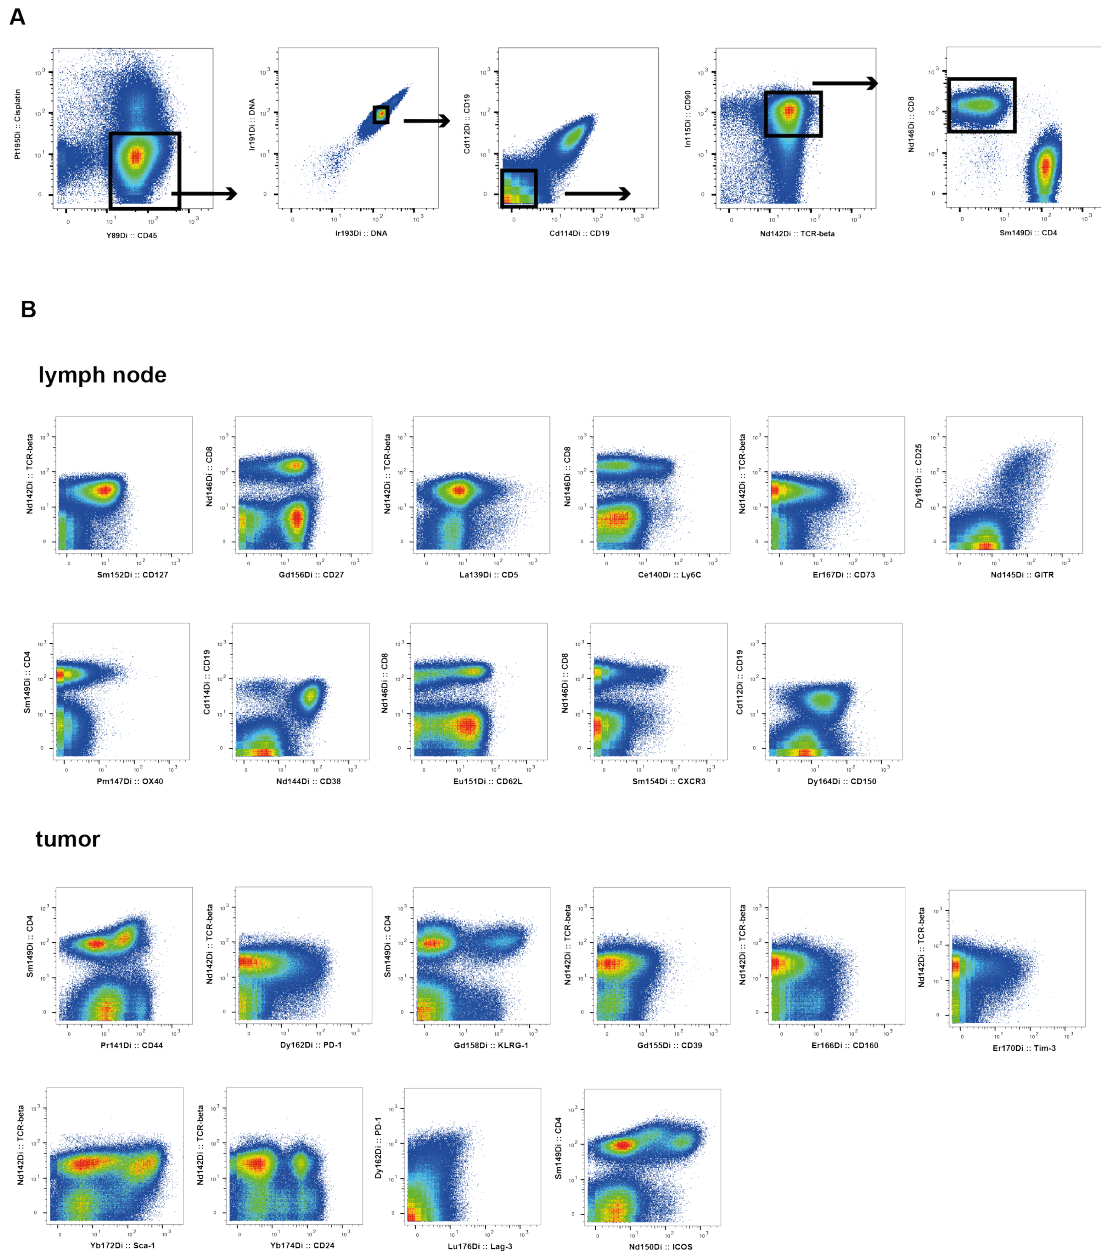

**Supplementary Figure 1. Antibody staining assessed by mass cytometry. (A)** General gating strategy for the identification of CD8<sup>+</sup> T cells by mass cytometry. Shown are biaxial dot plots from the draining lymph nodes of tumour bearing mice. **(B)** Quality of surface marker stainings assessed by mass cytometry. Shown are biaxial dot plots from the draining lymph nodes or tumours from tumour bearing mice.

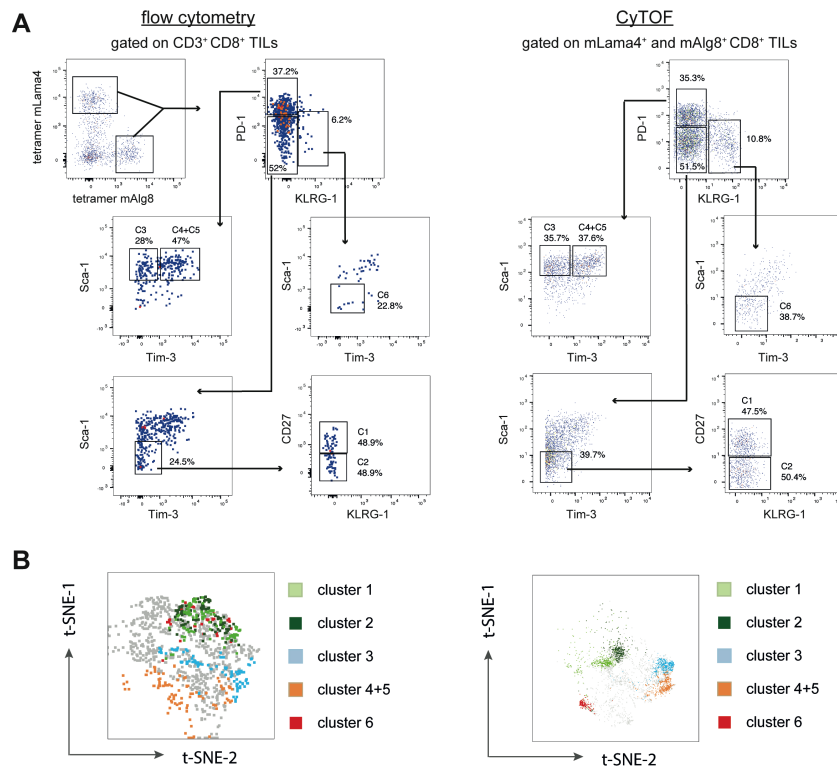

**Supplementary Figure 2. Flow cytometry analysis of neoantigen-specific TILs.** (A) Manual gating on neoantigen-specific CD8<sup>+</sup> T cells from individual tumours of untreated tumour bearing mice analyzed by flow cytometry in comparison to data obtained by mass cytometry. Sequential biaxial dot plot gating strategy according to the signature markers characteristic for clusters C1-C6 segregated by t-SNE identified in Fig. 2A. Data shown is one representative of at least three independent experiments. (B) Visualized t-SNE maps displaying the distribution of tetramer positive antigen-specific T-cell clusters assessed by flow and mass cytometry.

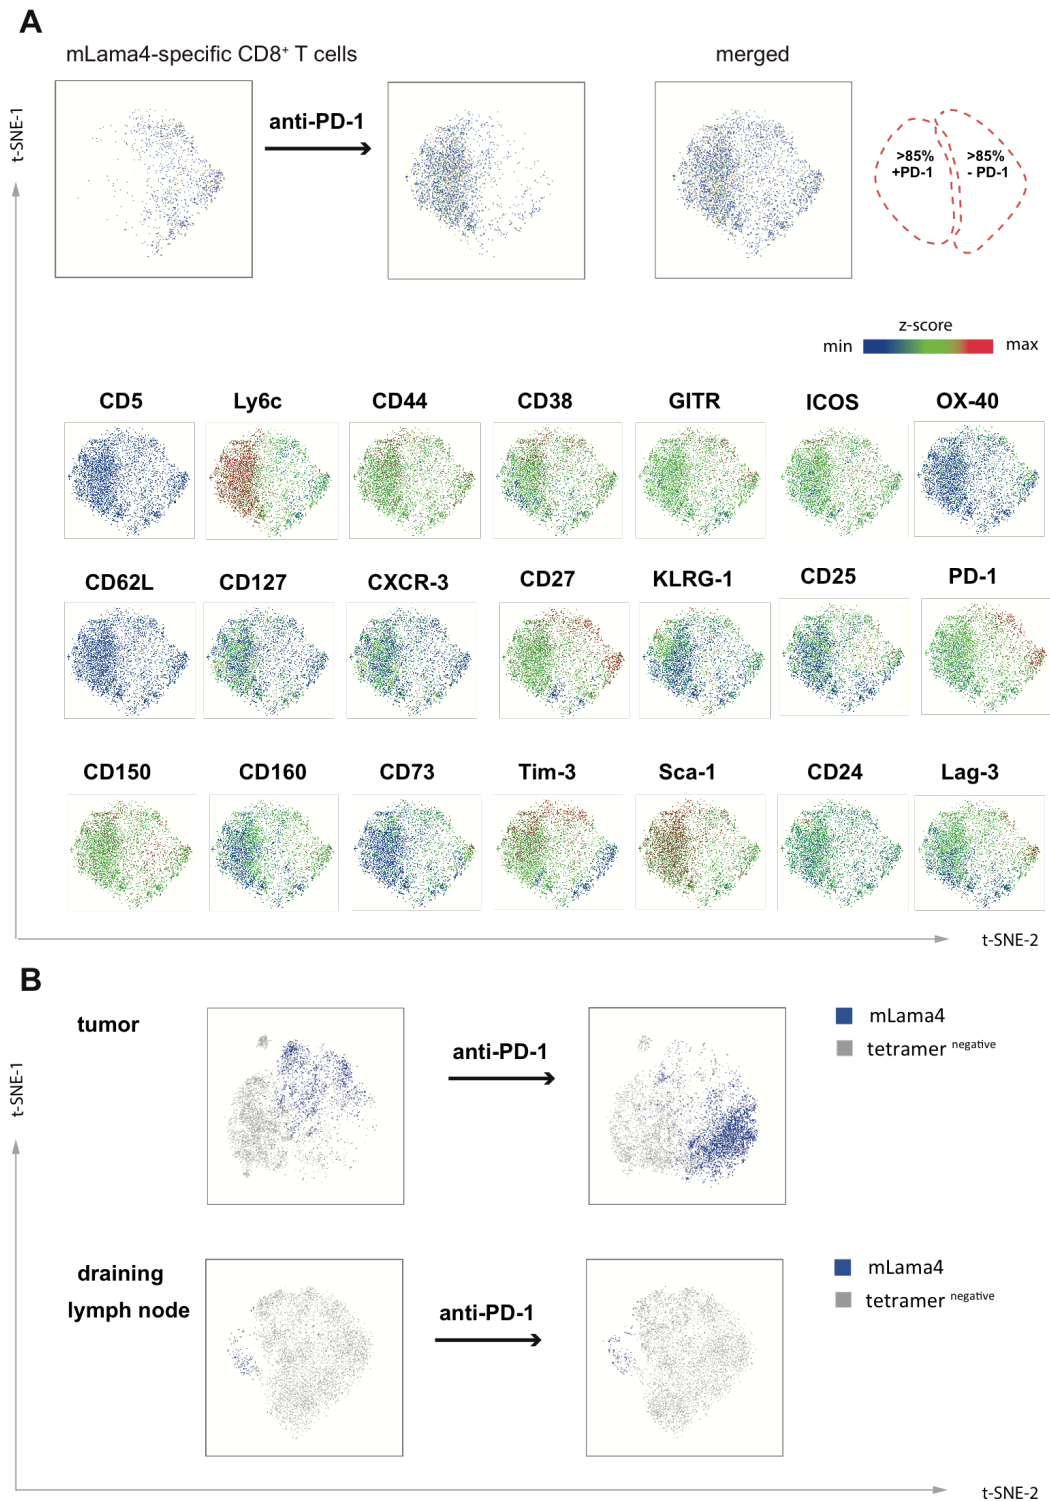

**Supplementary Figure 3. PD-1 blocking affects phenotypes of neoantigen-specific TILs. (A)** Anti-PD-1 treatment shifts mLama4-specific TILs from different clusters towards a novel position on a two-dimensional t-SNE plot. Cluster specific phenotypes are represented by normalized expression intensities of relevant marker molecules displayed on the merged t-SNE map. The vast majority of cells derived

from anti-PD-1 or isotype treated tumour bearing mice occupy the left or right moiety of the t-SNE plot respectively. **(B)** Visualized t-SNE map highlighting the distribution of mLama4-specific T cells and tetramer negative cells within tumours and draining lymph nodes. In contrast to tumours, T-cell clusters specific for mLama4 from draining lymph nodes can be identified within similar positions on a two-dimensional t-SNE plot, irrespectively of anti-PD1 treatment. Data shown is one representative of three independent experiments (n=5 mice per group).

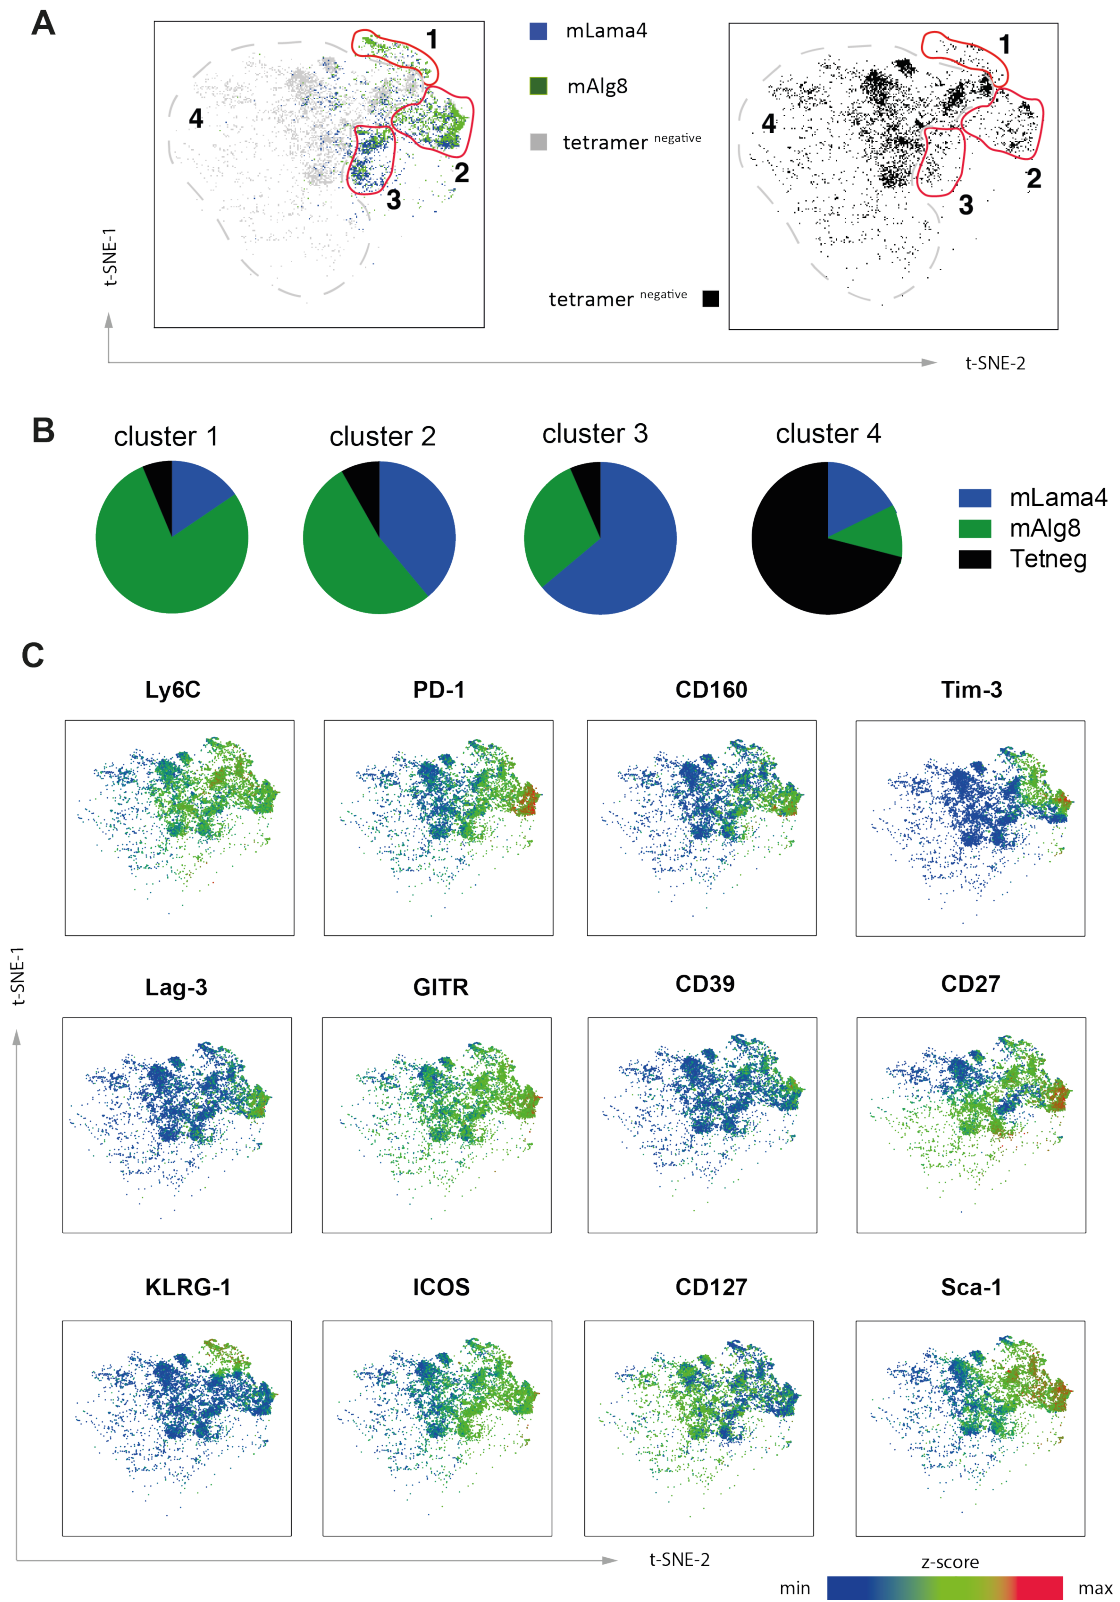

**Supplementary Figure 4. Phenotypic overlaps between tumour-specific and tetramer negative TILs. (A) Manual gating identified four overlapping clusters**

segregated by t-SNE that consist of tumour derived neoantigen-specific CD8<sup>+</sup> T cells (mLama4 and mAlg8) and tetramer negative CD8<sup>+</sup> T cells. **(B)** Pie charts displaying percentages of antigen-specific and tetramer negative T cells for each cluster identified in (A). **(C)** Normalized expression intensities of relevant marker molecules displayed on the t-SNE map.

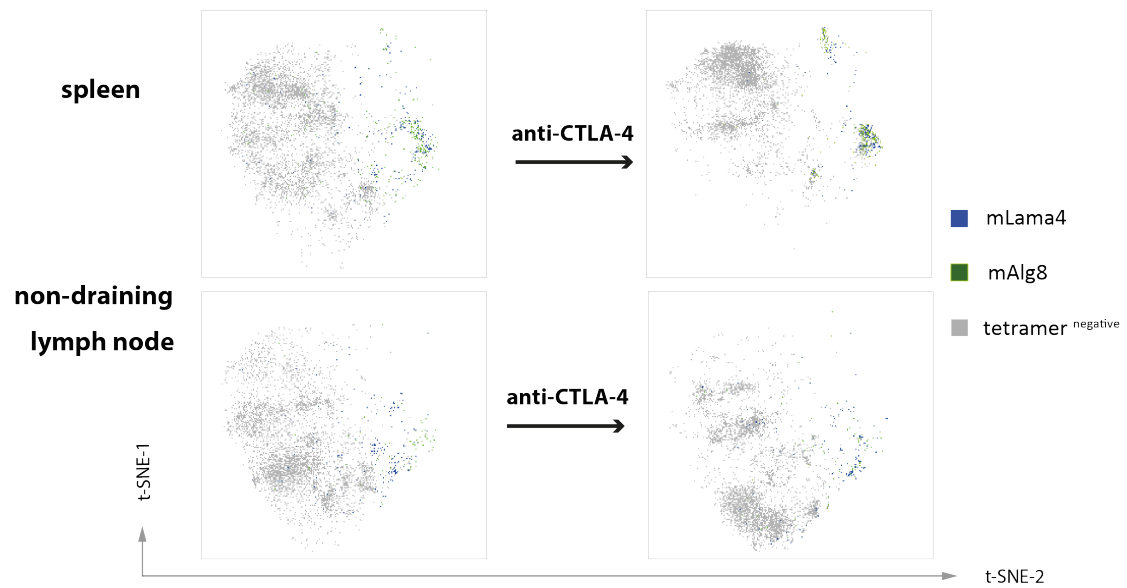

**Supplementary Figure 5. Distribution of neoantigen-specific and tetramer negative TILs.** CD8<sup>+</sup> T cells from spleens and non-draining lymph nodes in anti-CTLA-4 and control (isotype) mAbs treated mice (related to Fig. 4A, n=5 mice per group).



Supplementary Table 1: Epitope candidates

| peptide            | sequence  | peptide            | sequence  |
|--------------------|-----------|--------------------|-----------|
| Gpr108             | SVRSYSRL  | EG668618           | IVPFYPAL  |
| Slco1c1            | ILYLFAST  | Col9a1             | VAFSYKGM  |
| Dsc1               | TSLKYKIL  | Olfr1225           | VSWAG AFL |
| Olfr1239           | ISDMYPLL  | Spop               | LSPVFSAM  |
| Lama4              | VGFNFRTL  | Nrxn3              | SMYKYRNR  |
| Nf1                | SITAYLNL  | Tpm2               | TTLLFSFL  |
| Olfr1121           | SYRYVAI   | Sspo               | SSLSYCSV  |
| 3425401B19Rik      | VNSTYSPL  | Prss34             | VIENFMPL  |
| Ak7                | ATYVVASV  | 4932438H23Rik      | ISFLDMAL  |
| Acsf3              | VGATYVML  | Sart3              | MWLEYSNL  |
| Vmn1r90            | VITLFEGL  | Tnfsf14            | VSLSLVLL  |
| Batf               | VVYSAHAL  | Calcoco1           | QLYQFPYV  |
| Ccny               | YTIKFVAL  | Zfp619             | RGFSYLRI  |
| Sema6d             | PMYRYRRL  | ENSMUSG00000078985 | SNTAYMQL  |
| Sbf2               | FNYLYSPL  | Atp13a5            | IGYVYAQK  |
| Serpinb9f          | SSVEFIFL  | Vkorc1             | TAISFSRV  |
| Oprd1              | ITALYSAL  | Lass4              | LNIAHFRL  |
| Cpn1               | SAFLHLLL  | Ube2C              | LSLEFPSV  |
| 6430548M08Rik      | KVYLYTRL  | Olfr683            | LSYSFILM  |
| Fpr2               | TTILYLNL  | Olfr684            | LSLLYIVL  |
| Gpr98              | VNFCYVLV  | Olfr12             | MAYDRFMAM |
| Apob               | SSNVYSNL  | Olfr1030           | VQFYFFIAM |
| EG667741           | ANWPYTNL  | Cntnap5b           | VRFVRFVPL |
| EG624584           | SLFPFFNV  | Olfr73             | VQFFFFSTF |
| Olfr53             | TSVLYSFV  | Cpn1               | SAFLHLLLL |
| Olfr849            | VSVLFFRV  | Ncapg              | IHYLKYSMV |
| LOC328483          | STTVYPTL  | Olfr1204           | PIYYFLAYL |
| Abcd2              | YSPKFGSL  | Adam29             | YNYFWSYTL |
| Olfr1440           | VIFVVASV  | Cx3cr1             | ISIDRYIAI |
| Alg8               | ITYTWTRL  | Trpv6              | VMLERKLPL |
| BC018465           | ISFSLAQM  | Gpr98              | ANFTFSAWL |
| Olfr1204           | IYYFLAYL  | Olfr168            | VVTFYYAHF |
| Olfr988            | MIYVV TLL | Olfr845            | VSLFYVTGL |
| Olfr1424           | IYFLLRNL  | Lrrn1              | LSYIHSLAF |
| Olfr168            | VTFYYAHF  | Psg23              | IVYSNRSLL |
| Olfr169            | AHFVYTYL  | Fahd2a             | TFHTFCPL  |
| Neur1B             | VIYTCGPM  | Lrrn2              | SHRAFAGL  |
| Mlc1               | VIPNFQIL  | ENSMUSG00000054758 | VPLSYNRL  |
| Fbxl4              | STGCFARL  | Lrrc8a             | SFVIFYGL  |
| ENSMUSG00000078806 | FSPGFRRRL | Gm98               | YYHFHYSL  |
| 4930404A10Rik      | KAQQFANL  |                    |           |

Supplementary Table 2: Antibodies used for mass cytometry staining panel

| <b>antibody</b> | <b>clone</b> | <b>provider</b>   |
|-----------------|--------------|-------------------|
| CD90            | T24/31       | BioXcell          |
| CD45            | 30-F11       | Fluidigm          |
| CD19 Q-dot      | 6D5          | Life technologies |
| CD5             | 53-7.3       | Biolegend         |
| Ly6C            | HK1.4        | Biolegend         |
| CD38            | 90           | Biolegend         |
| CD44            | IM7          | BioXcell          |
| TCR-beta        | H57-597      | Biolegend         |
| GITR            | DTA-1        | Biolegend         |
| CD8a            | 53-6.7       | Biolegend         |
| OX-40           | OX-86        | Biolegend         |
| CD4             | H129.15      | Biolegend         |
| ICOS            | C358.4A      | Biolegend         |
| CD62L           | MEL-14       | Biolegend         |
| CD127           | A7R34        | Biolegend         |
| CXCR-3          | CXCR3-173    | Biolegend         |
| CD39            | 5F2          | Biolegend         |
| CD27            | LG.7F9       | eBioscience       |
| KLRG-1          | 2F1          | Biolegend         |
| CD25            | PC61         | Biolegend         |
| PD-1            | 29F.1A12     | Biolegend         |
| CD150           | TC15-12F12.2 | Biolegend         |
| CD160           | 7H1          | Biolegend         |
| Tim-3           | B8.2C12      | Biolegend         |
| CD24            | M1/69        | Biolegend         |
| Sca-1           | D7           | Biolegend         |
| Lag-3           | C9B7W        | Biolegend         |
| CD73            | TY/23        | BD                |
